# Supplementary material
Source: publisher figshare collection journal article supplement (https://acs.figshare.com/ndownloader/files/22778084)
Supplement: Supplementary file 1 [file 22778084]

## Supporting Information

# EDTA-Inspired Polydentate Hydrogels with Exceptionally High Heavy Metal Adsorption Capacity as Reusable Adsorbents for Wastewater Purification

Sudipta Panja,<sup>‡†\*</sup> Samuel Hanson <sup>‡</sup>, and Chun Wang <sup>‡\*</sup>

<sup>‡</sup>*Department of Biomedical Engineering, University of Minnesota, Minneapolis, Minnesota 55455, United States*

<sup>†</sup>*McKetta Department of Chemical Engineering, University of Texas at Austin, Austin, Texas 78712, United States*

## Corresponding Authors

1. Chun Wang, E-mail: **wangx504@umn.edu**. Telephone: +1-612-626-3990.
2. Sudipta Panja, E-mail: **spanja@umn.edu** and **sudiptapanjachem@gmail.com**. Telephone: +1-512-576-2995.

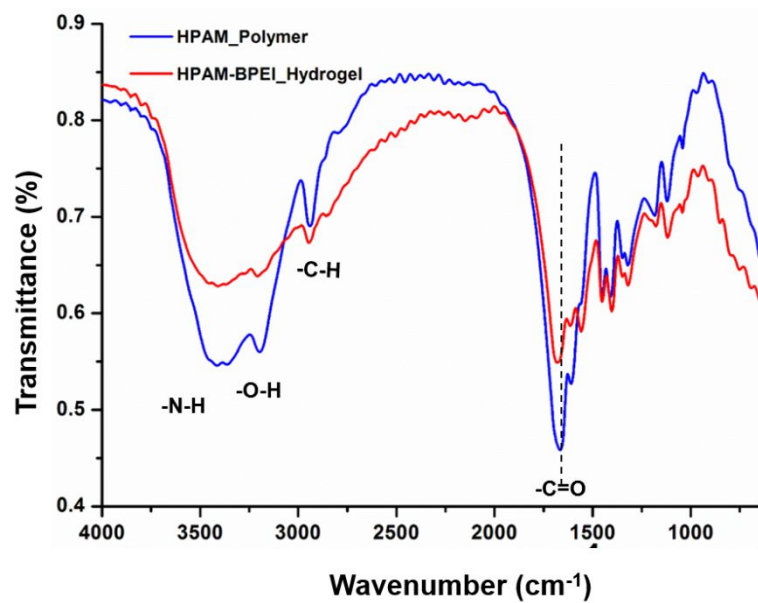

**Figure S1.** FTIR spectra of the HPAM polymer and synthesized hydrogel (Sample HG-1)

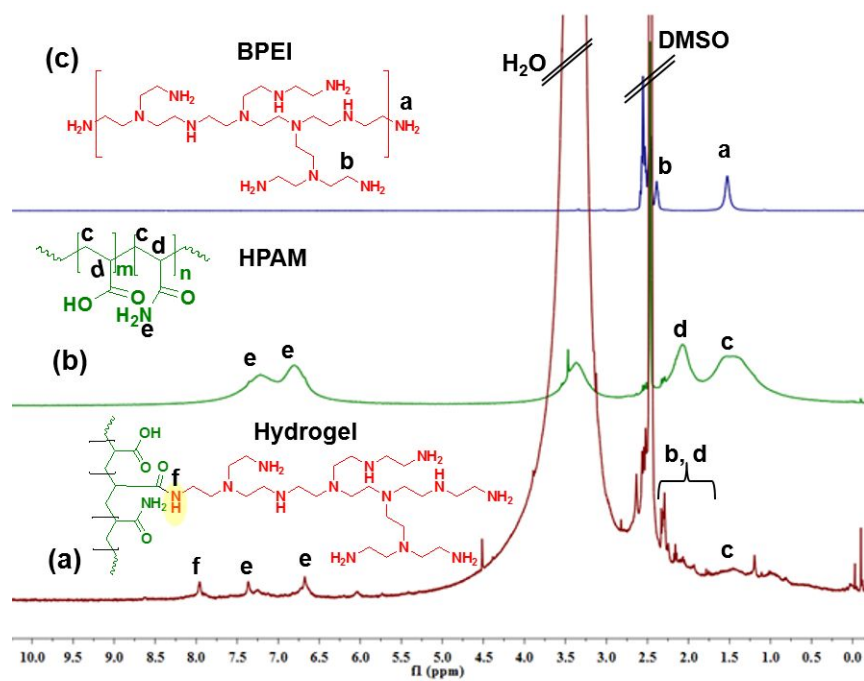

**Figure S2.**  $^1\text{H}$  NMR of the (a) BPEI, (b) HPAM polymer and (c) synthesized hydrogel in  $\text{DMSO-d}_6$

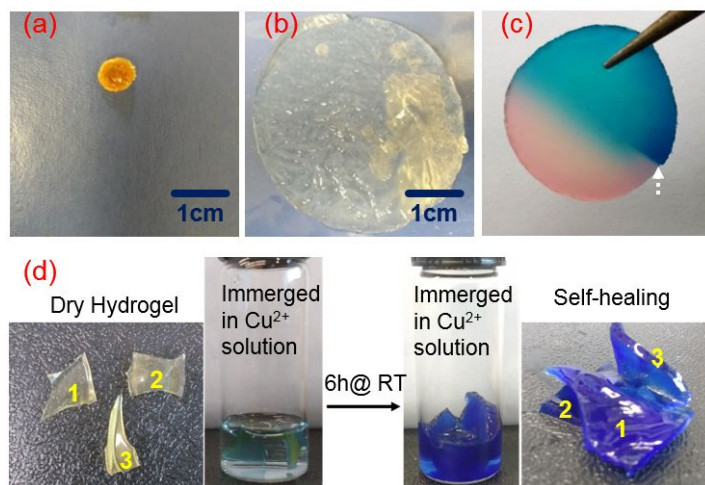

**Figure S3.** Images of (a) dry and (b) swollen hydrogel (Sample HG-1). (c) Self-healing of the two separate hydrogel pieces (stained with red and blue dyes) into a single gel. The white arrow indicates the part where a razor blade was placed to prevent contact between two hydrogel piece, resulting in no healing. (d) Self-healing of three pieces of hydrogel immersed in  $\text{Cu}^{2+}$  solution after 6 h at room temperature.

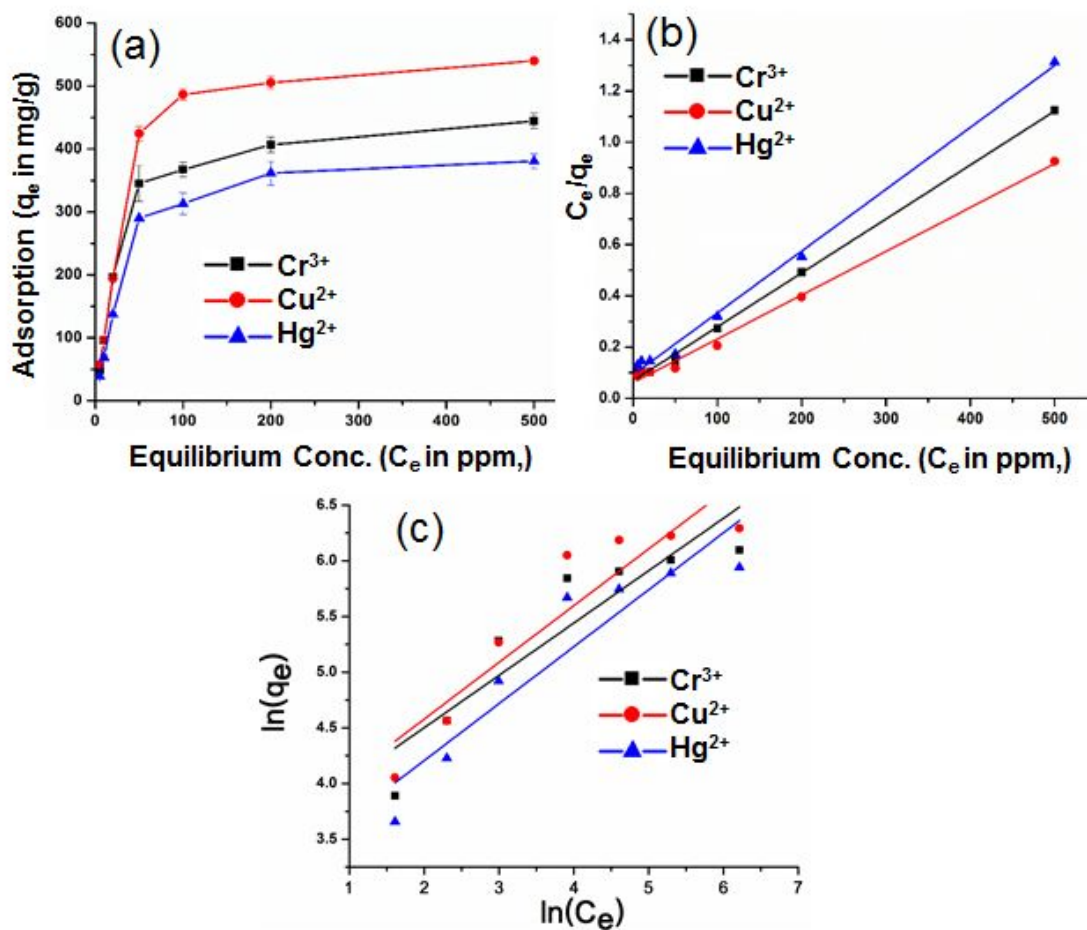

**Figure S4.** (a) Adsorption isotherms: metal ion adsorption capacity at equilibrium ( $q_e$ ) as a function of equilibrium concentration ( $C_e$ ) of the metal ions in solution. (b)  $C_e/q_e$  as a function of  $C_e$  and the linear fit with the Langmuir adsorption model. (c)  $\ln(q_e)$  as a function of  $\ln(C_e)$  and the linear fit with the Freundlich adsorption model.

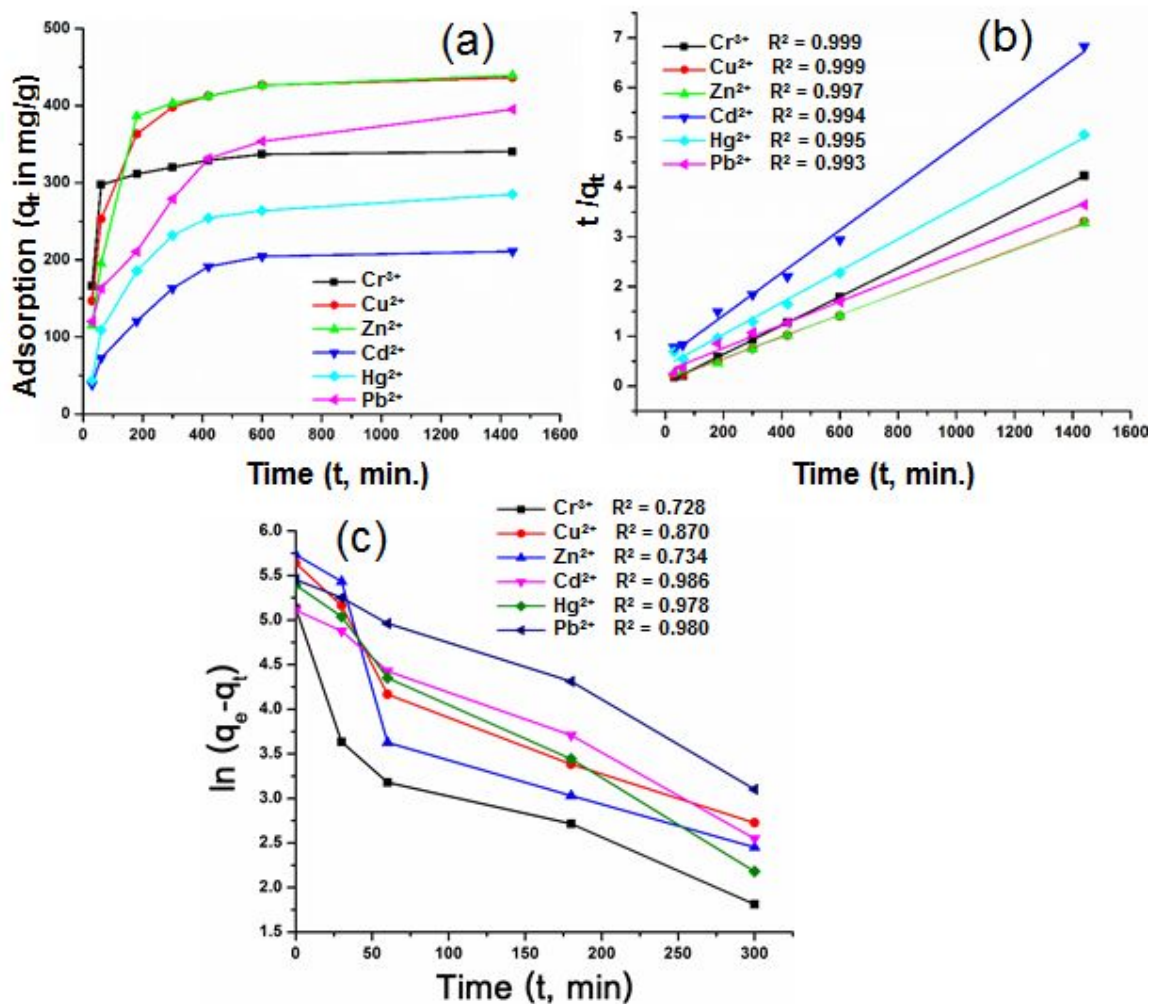

**Figure S5.** (a) Adsorption kinetics: the adsorption capacity of the metal ions ( $q_t$ ) as a function of time. (b)  $t/q_t$  as a function of time ( $t$ ) and the linear fit with pseudo second-order kinetics model. (c)  $\ln(q_e - q_t)$  as a function of time ( $t$ ) and the linear fit with pseudo first-order kinetics model.

**Table S1.** Calculated parameters corresponding to the Langmuir adsorption isotherm

| Metal Ions       | Langmuir adsorption isotherm      |                              |       | Freundlich adsorption isotherm |       |       |
|------------------|-----------------------------------|------------------------------|-------|--------------------------------|-------|-------|
|                  | $q_{\max}$ ( $\text{mg g}^{-1}$ ) | $K_L$ ( $\text{L mg}^{-1}$ ) | $R^2$ | $K_F$                          | $1/n$ | $R^2$ |
| $\text{Cr}^{3+}$ | 473.93                            | 0.030                        | 0.997 | 3.56                           | 0.47  | 0.813 |
| $\text{Cu}^{2+}$ | 584.79                            | 0.0281                       | 0.994 | 3.55                           | 0.50  | 0.833 |
| $\text{Hg}^{2+}$ | 413.22                            | 0.0264                       | 0.995 | 3.18                           | 0.51  | 0.844 |

**Table S2.** Pseudo-first order and pseudo-second order kinetic parameters of adsorption of heavy metal ions by hydrogel

| Metal Ions       | Pseudo-first order kinetic  |       | Pseudo-second order kinetic             |                                              |       |
|------------------|-----------------------------|-------|-----------------------------------------|----------------------------------------------|-------|
|                  | $K_1$ ( $\text{min}^{-1}$ ) | $R^2$ | $q_{\text{cal}}$ ( $\text{mg g}^{-1}$ ) | $K_2$ ( $\text{g mg}^{-1} \text{min}^{-1}$ ) | $R^2$ |
| $\text{Cr}^{3+}$ | 0.0088                      | 0.728 | 357.14                                  | $1.29 \times 10^{-4}$                        | 0.999 |
| $\text{Cu}^{2+}$ | 0.0092                      | 0.870 | 454.54                                  | $4.69 \times 10^{-5}$                        | 0.999 |
| $\text{Zn}^{2+}$ | 0.0105                      | 0.734 | 476.19                                  | $3.36 \times 10^{-5}$                        | 0.997 |
| $\text{Cd}^{2+}$ | 0.0083                      | 0.986 | 238.09                                  | $3.13 \times 10^{-5}$                        | 0.994 |
| $\text{Hg}^{2+}$ | 0.0103                      | 0.978 | 322.58                                  | $2.39 \times 10^{-5}$                        | 0.995 |
| $\text{Pb}^{2+}$ | 0.0076                      | 0.980 | 434.78                                  | $1.80 \times 10^{-5}$                        | 0.993 |

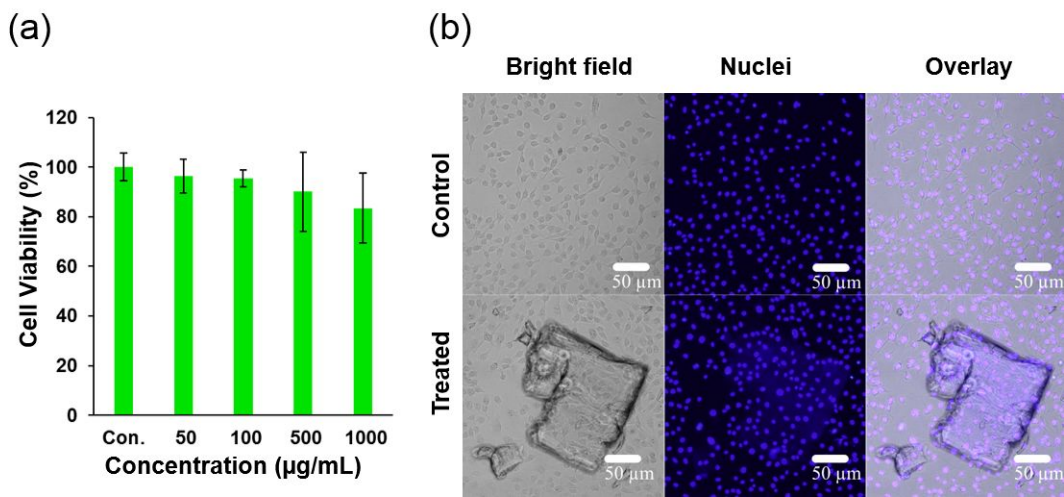

**Figure S6.** Cytotoxicity of the EDTA-inspired polydentate hydrogels toward mouse fibroblasts. (a) Dose-dependent cell viability. (b) Images of cells captured after 24 h of incubation with the hydrogel. The nuclei of the cells were stained with NucBlue® Live ReadyProbes® Reagent.
